# Supplementary material
Source: PubMed Central journal article supplement (PMC4274239)
Supplement: NIHMS645950-supplement-2.pdf [file NIHMS645950-supplement-2.pdf]

## Supplementary Information

### Supplementary Material and Methods

**Ricin and LT cytotoxicity assays.** Vero cell assays utilized 10 ng/mL of ricin toxin (Vector Labs), whereas J774 assays employed 300 ng/mL LT, with a 1:1 mass ratio of PA and LF. In both assays, 5,000 cells per well were seeded in a 96 well opaque cell culture treated plate in DMEM plus 10% fetal bovine serum. Serum samples were serially diluted and then mixed with toxin before being applied to 96 well plates. In the Vero cell assays, the toxin-antisera mixtures was allowed to incubate at 37°C for 2 hours, at which point the media was changed. CellTiter-Glo® (Promega, Madison, WI) was then used to determine cell viability 48 hours later. In the J774 assays, the media was not changed after the toxin-antisera mixtures were added to the cells. Cell viability was determined using CellTiter-Glo® 24 hours later.

**Table S1. Serum analysis of mice immunized with RiVax, DNI or the combination.**

| Grp   | Mouse <sup>a</sup> | Ricin Endpoint |        | PA Endpoint    |        | Ricin TNA |       | LT TNA |       | Survival <sup>b</sup> |     |
|-------|--------------------|----------------|--------|----------------|--------|-----------|-------|--------|-------|-----------------------|-----|
|       |                    | d 20           | d 200  | d 20           | d 200  | d 20      | d 200 | d 20   | d 200 | Ricin                 | LT  |
| RiVax | A1                 | 204800         | 102400 | 1 <sup>c</sup> | 1      | 1         | 800   | 1      | 1     |                       | No  |
|       | A2                 | 204800         | 204800 | 1              | 1      | 1         | 1600  | 1      | 1     |                       | No  |
|       | A3                 | 204800         | 102400 | 1              | 1      | 1         | 800   | 1      | 1     |                       | No  |
|       | A4                 | 204800         | 51200  | 1              | 1      | 100       | 100   | 1      | 1     |                       | No  |
|       | A5                 | 204800         | 102400 | 1              | 1      | 1         | 400   | 1      | 1     |                       | No  |
|       | B1                 | 204800         | 51200  | 1              | 1      | 1         | 100   | 1      | 1     | Yes                   |     |
|       | B2                 | 204800         | 102400 | 1              | 1      | 1         | 800   | 1      | 1     | Yes                   |     |
|       | B3                 | 204800         | 102400 | 1              | 1      | 1         | 200   | 1      | 1     | Yes                   |     |
|       | B4                 | 204800         | 204800 | 1              | 1      | 1         | 1600  | 1      | 1     | Yes                   |     |
|       | B5                 | 204800         | 204800 | 1              | 1      | 1         | 400   | 1      | 1     | Yes                   |     |
| DNI   | A1                 | 1              | 1      | 204800         | 409600 | 1         | 1     | 1600   | 3200  | (No)                  | Yes |
|       | A2                 | 1              | 1      | 204800         | 204800 | 1         | 1     | 800    | 800   | (No)                  | Yes |
|       | A3                 | 1              | 1      | 204800         | 204800 | 1         | 1     | 800    | 1600  | (No)                  | Yes |
|       | A4                 | 1              | 1      | 204800         | 102400 | 1         | 1     | 1600   | 1600  | (No)                  | Yes |
|       | A5                 | 1              | 1      | 204800         | 102400 | 1         | 1     | 1600   | 1600  | (No)                  | Yes |
|       | B1                 | 1              | 1      | 102400         | 204800 | 1         | 1     | 200    | 1600  | No                    |     |
|       | B2                 | 1              | 1      | 204800         | 204800 | 1         | 1     | 800    | 3200  | No                    |     |
|       | B3                 | 1              | 1      | 204800         | 102400 | 1         | 1     | 1600   | 1600  | No                    |     |
| B4    | 1                  | 1              | 204800 | 204800         | 1      | 1         | 3200  | 1600   | No    |                       |     |
| Dual  | A1                 | 51200          | 102400 | 102400         | 51200  | 1         | 800   | 400    | 800   | (Yes)                 | Yes |
|       | A2                 | 204800         | 102400 | 204800         | 51200  | 1         | 800   | 800    | 800   | (Yes)                 | Yes |
|       | A3                 | 204800         | 204800 | 102400         | 51200  | 1         | 800   | 100    | 200   |                       | No  |
|       | A4                 | 102400         | 204800 | 6400           | 51200  | 1         | 800   | 200    | 1600  | (Yes)                 | Yes |
|       | A5                 | 102400         | 51200  | 51200          | 51200  | 1         | 400   | 200    | 400   | (Yes)                 | Yes |
|       | B1                 | 102400         | 102400 | 25600          | 51200  | 1         | 400   | 1      | 400   | Yes                   |     |
|       | B2                 | 102400         | 51200  | 12800          | 102400 | 1         | 100   | 400    | 1600  | Yes                   |     |
|       | B3                 | 204800         | 102400 | 204800         | 102400 | 1         | 400   | 3200   | 800   | Yes                   |     |
|       | B4                 | 102400         | 51200  | 12800          | 51200  | 1         | 200   | 100    | 1600  | Yes                   |     |
|       | B5                 | 204800         | 102400 | 51200          | 25600  | 1         | 400   | 800    | 1600  | Yes                   |     |
| Ctrl  | A1                 | 1              | 1      | 1              | 1      | 1         | 1     | 1      | 1     |                       | No  |
|       | A2                 | 1              | 1      | 1              | 1      | 1         | 1     | 1      | 1     |                       | No  |
|       | A3                 | 1              | 1      | 1              | 1      | 1         | 1     | 1      | 1     |                       | No  |
|       | A4                 | 1              | 1      | 1              | 1      | 1         | 1     | 1      | 1     |                       | No  |
|       | A5                 | 1              | 1      | 1              | 1      | 1         | 1     | 1      | 1     |                       | No  |
|       | B1                 | 1              | 1      | 1              | 1      | 1         | 1     | 1      | 1     | No                    |     |
|       | B2                 | 1              | 1      | 1              | 1      | 1         | 1     | 1      | 1     | No                    |     |
|       | B3                 | 1              | 1      | 1              | 1      | 1         | 1     | 1      | 1     | No                    |     |
|       | B4                 | 1              | 1      | 1              | 1      | 1         | 1     | 1      | 1     | No                    |     |
|       | B5                 | 1              | 1      | 1              | 1      | 1         | 1     | 1      | 1     | No                    |     |

<sup>a</sup>, Each group of immunized mice was arbitrarily divided into two subsets (A, B) following the second immunization. The A subset received a primary challenge with LT, while the B subset (shaded) received a primary challenge with ricin. Survival (far right columns) following challenge is indicated as “yes” or “no” for each animal. <sup>b</sup>, The DNI-immunized and the dual-immunized A subsets of animals that survived LT challenge received a secondary challenge with ricin. The outcome of the secondary challenge is indicated in parentheses.

## SUPPLEMENTAL INFORMATION

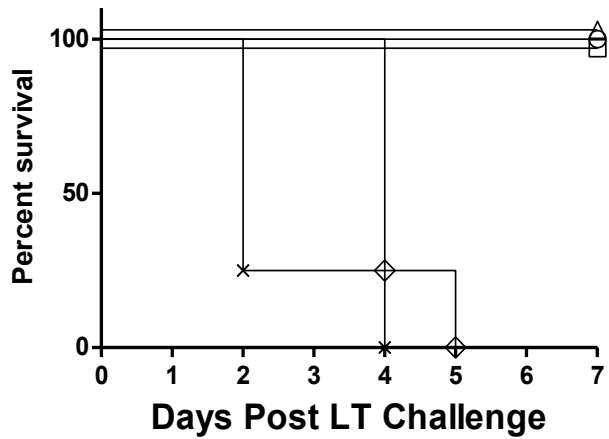

**Figure S1. LT LD<sub>100</sub> Determination.** A dose response experiment was performed to determine the LD<sub>100</sub> of a stock of LF and PA. Using a 1:1 mass ratio of PA and LF, groups of four naïve mice received vehicle (circle), or 25 µg (square), 50 µg (triangle), 100 µg (diamond) or 200 µg (cross) µg of LT. Based on the observation that all mice given  $\geq 100$  µg or more died within 5 days of challenge, the LD<sub>100</sub> was set at 100 µg, which equates to 50 µg each of PA and LF. For the studies shown in Table 3, mice were challenged with 250 µg LT, equal to 2.5xLD<sub>100</sub>.

**A**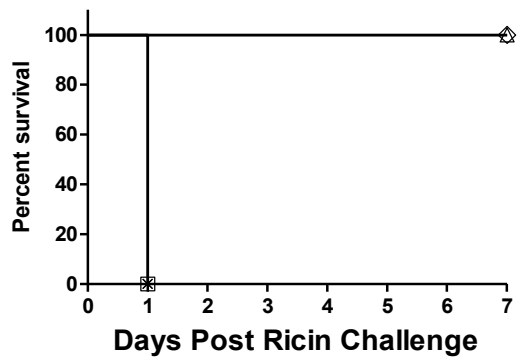**B**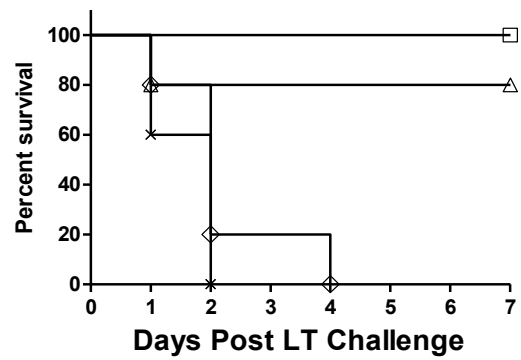

**Figure S2. Survival plots following primary ricin and LT challenges.** Groups of immunized mice, as described in the text that had been immunized with RiVax (diamonds), DNI (squares), the combination of RiVax and DNI (triangles) or vehicle (cross) were challenged with (A)  $10 \times LD_{50}$  of ricin or (B)  $2.5 \times LD_{100}$  of LT. Survival was monitored for 7 days.
